# Supplementary material for: Emergence of Enzalutamide Resistance in Prostate Cancer is Associated with BCL-2 and IKKB Dependencies
Source: Oxford University Press journal article supplement (doi:10.1158/1078-0432.ccr-20-3260), 2021-02-04
Supplement: 10780432ccr203260-sup-249714_2_supp_6883296_qnqsyd.docx [file 10780432ccr203260-sup-249714_2_supp_6883296_qnqsyd.docx]

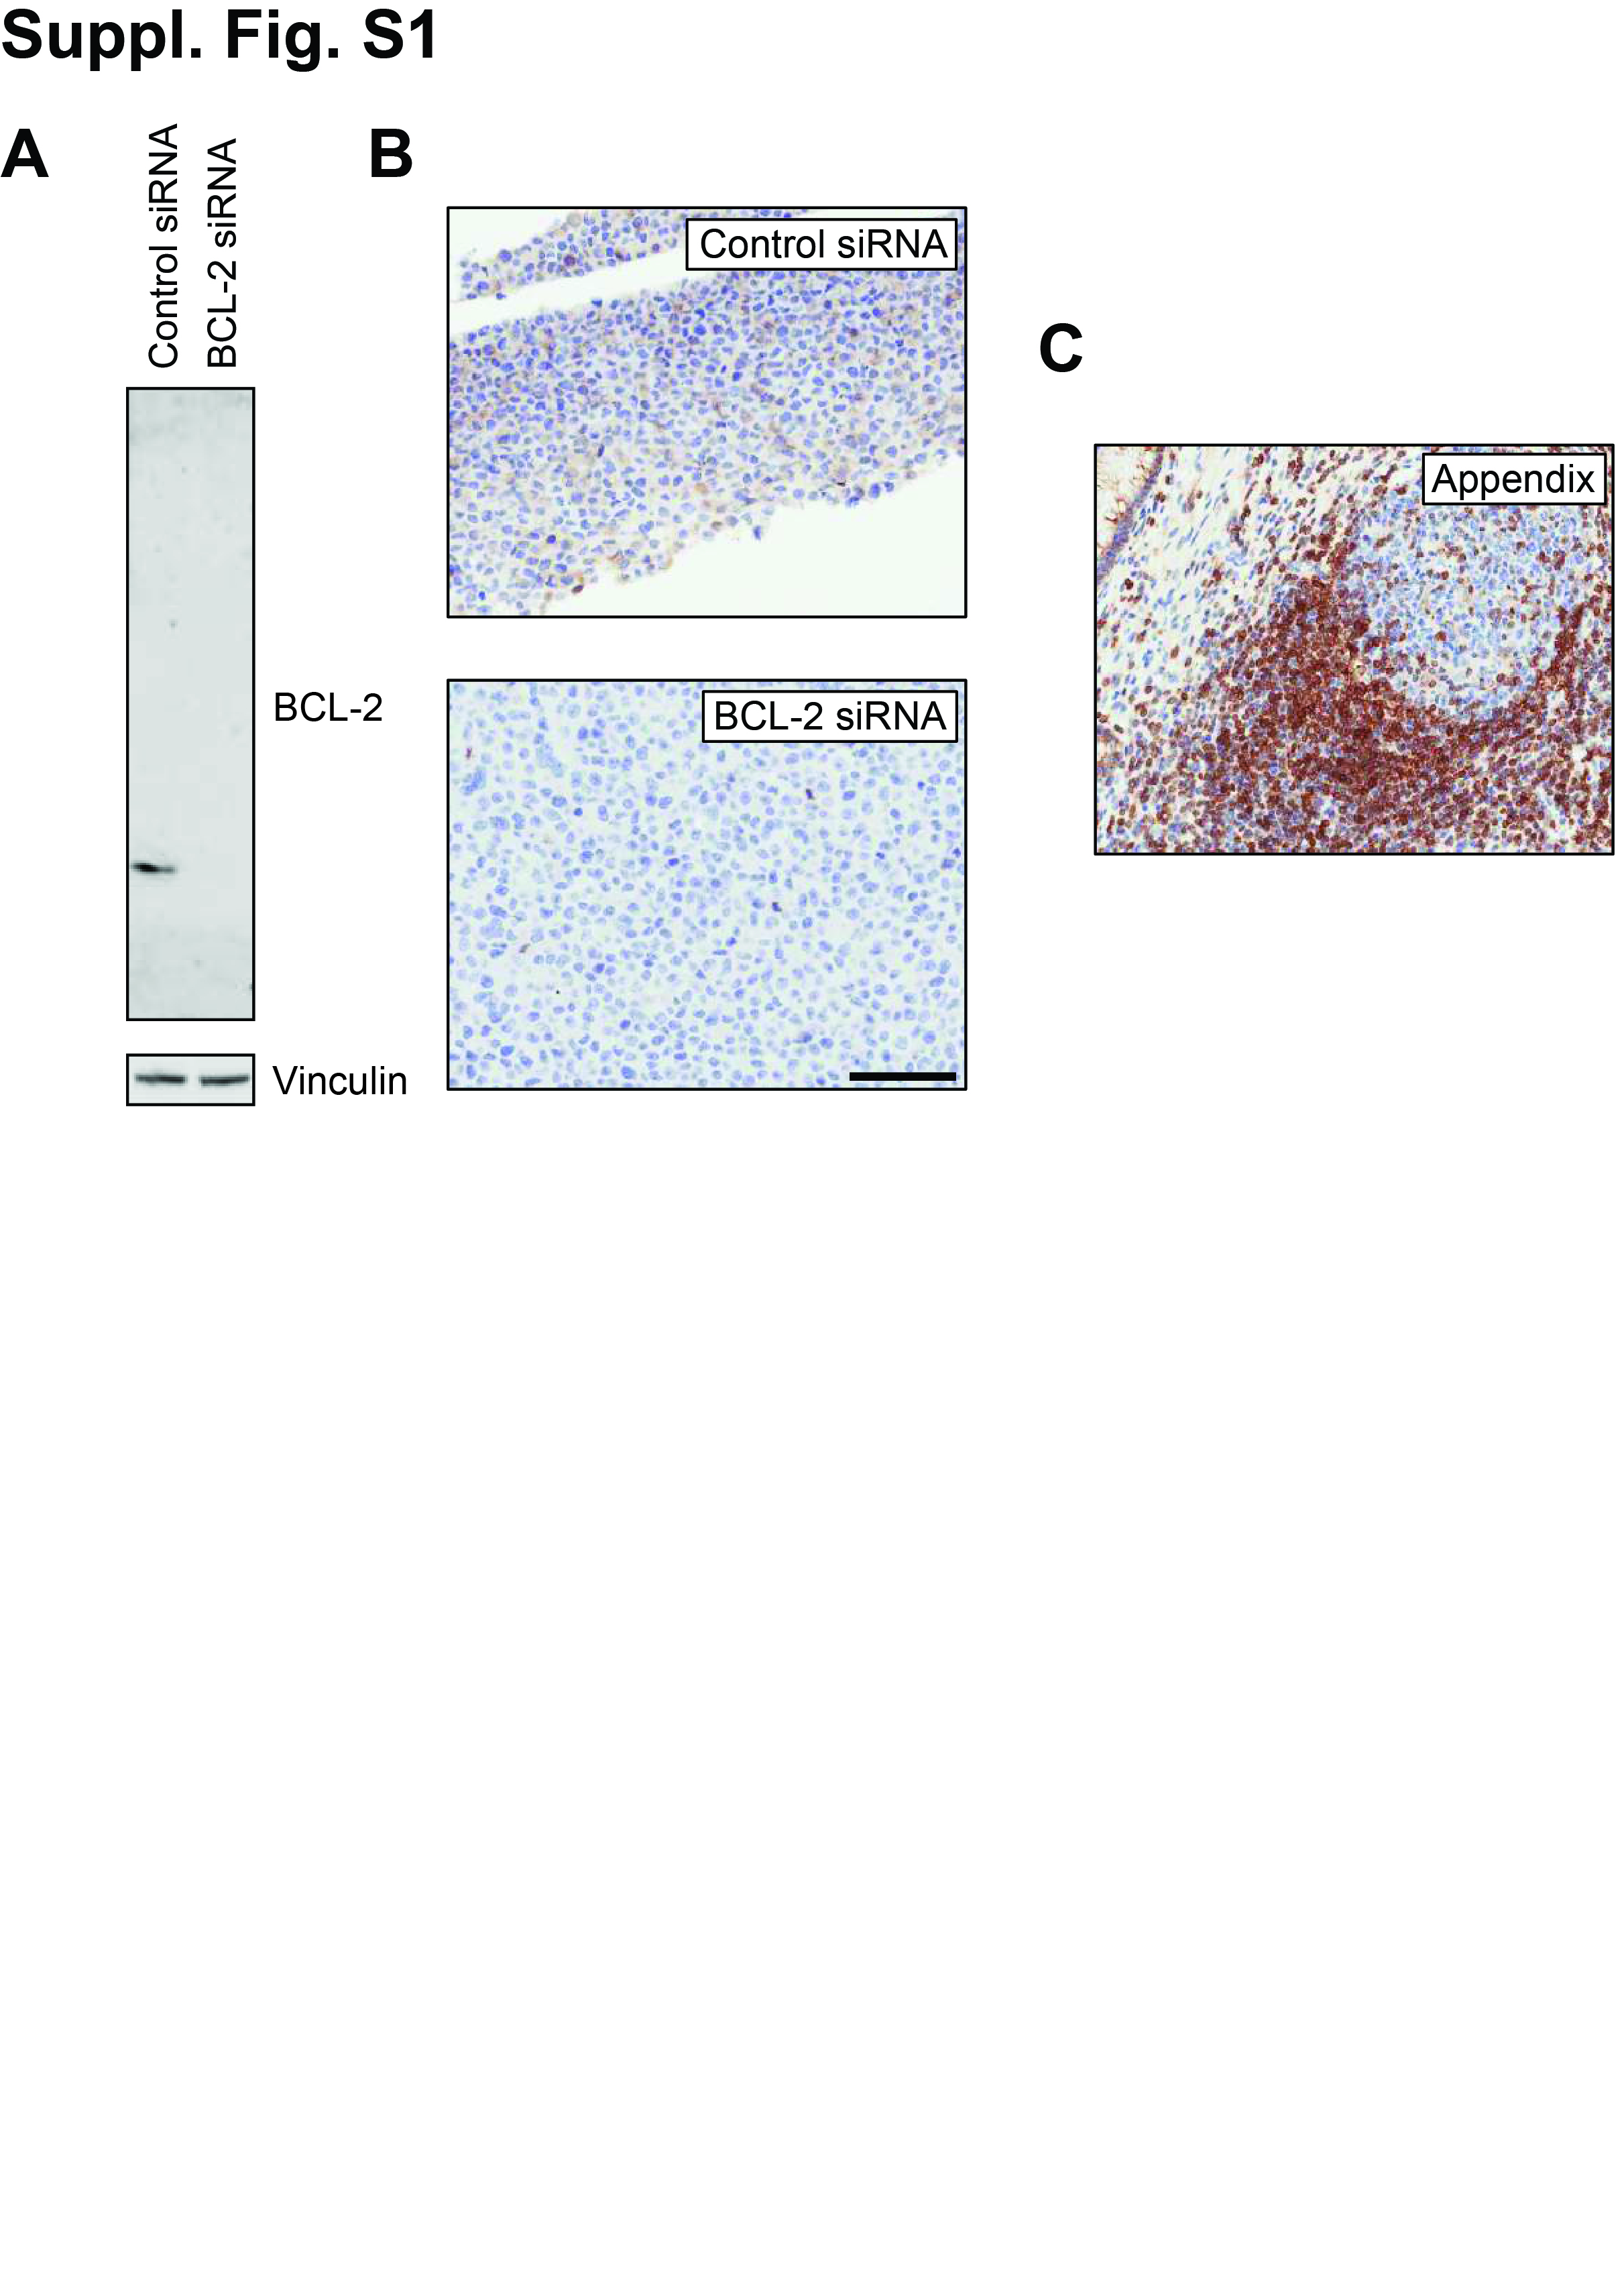


**Supplementary Figure S1. BCL-2 immunohistochemistry validation.**

A~B. Western blot (A) and immunohistochemistry (B) of BCL-2 protein expression in LNCaP95 cells transfected with control siRNA or BCL-2 siRNA (scale bar 100 µm).

C. Positive tissue (appendix) control for BCL-2 expression (scale bar 100 µm).
