# Supplementary material for: Emergence of Enzalutamide Resistance in Prostate Cancer is Associated with BCL-2 and IKKB Dependencies
Source: Oxford University Press journal article supplement (doi:10.1158/1078-0432.ccr-20-3260), 2021-02-04
Supplement: 10780432ccr203260-sup-249714_2_supp_6883301_qnqsyf.docx [file 10780432ccr203260-sup-249714_2_supp_6883301_qnqsyf.docx]

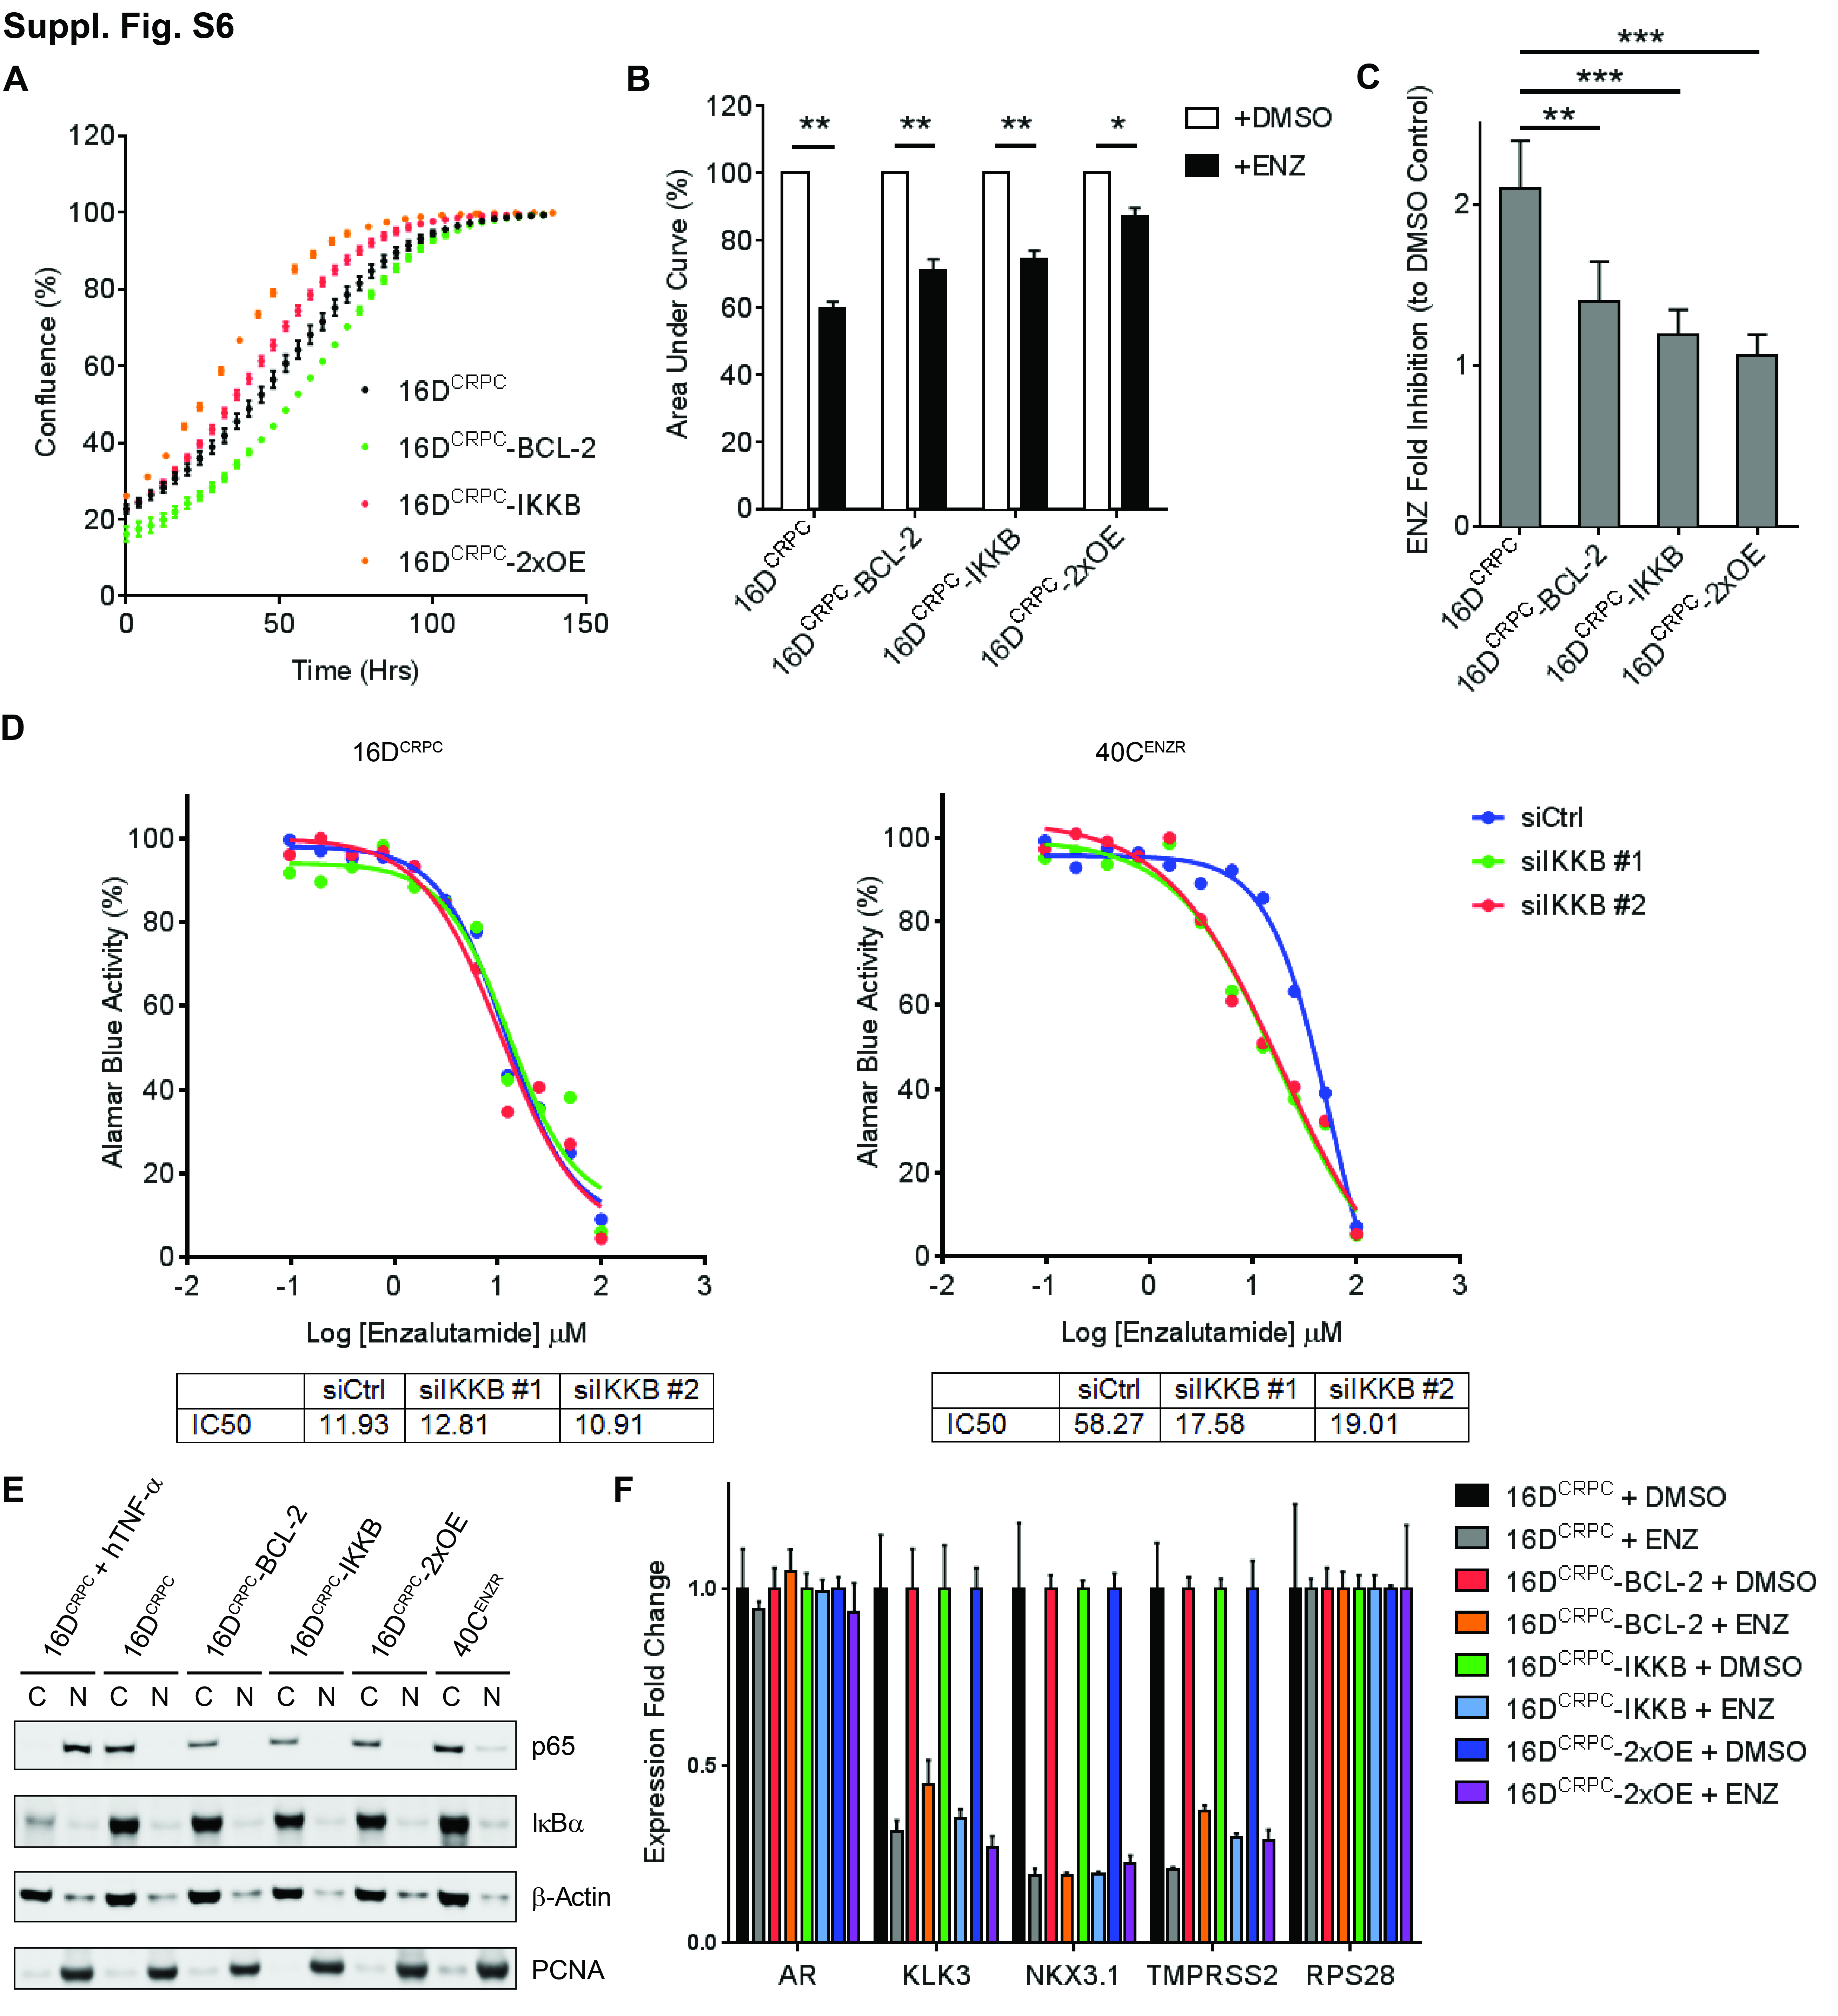


**Supplementary Figure S6. 16DCRPC cell line variants expressing BCL-2 and IKKB are resistant to ENZ.**

A. Growth kinetics of 16DCRPC cell line variants in complete media without ENZ.

B. Normalized Area Under Curve for the growth kinetics of 16DCRPC cell line variants in the absence and presence of 20 M ENZ. All ENZ-treated cells were normalized to DMSO controls within the same cell line variants. *, p < 0.05. **, p < 0.01.

C. ENZ fold inhibition of cell viability measured by Alamar Blue assays at last timepoint. All treated cell variants were normalized to DMSO controls within the same cell variant. **, p < 0.01. ***, p < 0.001.

D. Representative curve of cell viability of 16DCRPC (left) and 40CENZR (right) cells after 6 days of growth in varying concentrations of ENZ in the presence of 20 nM negative control (siCtrl), siIKKB #1 or siIKKB #2, with IC50 values (M) indicated at bottom.

E. Protein levels of nuclear p65 and cytoplasmic IB in 16DCRPC cell line variants and 40CENZR cells (C: cytoplasmic. N: nuclear). 16DCRPC cells treated by 30 ng/ml human tumor necrosis factor-alpha (hTNF-) for 1 hour served as positive control of the activation of NF-B pathway. -Actin used as cytoplasmic loading control. PCNA used as nuclear loading control.

F. mRNA expression levels of AR, KLK3, NKX3.1 and TMPRSS2 in 16DCRPC cell line variants after 6 days of growth in the presence of DMSO or 20 M ENZ. All treated cell variants were normalized to DMSO controls within the same cell variant. RPS28 used as internal control.
