# Supplementary material for: Emergence of Enzalutamide Resistance in Prostate Cancer is Associated with BCL-2 and IKKB Dependencies
Source: Oxford University Press journal article supplement (doi:10.1158/1078-0432.ccr-20-3260), 2021-02-04
Supplement: 10780432ccr203260-sup-249714_2_supp_6883302_qnqsyf.docx [file 10780432ccr203260-sup-249714_2_supp_6883302_qnqsyf.docx]

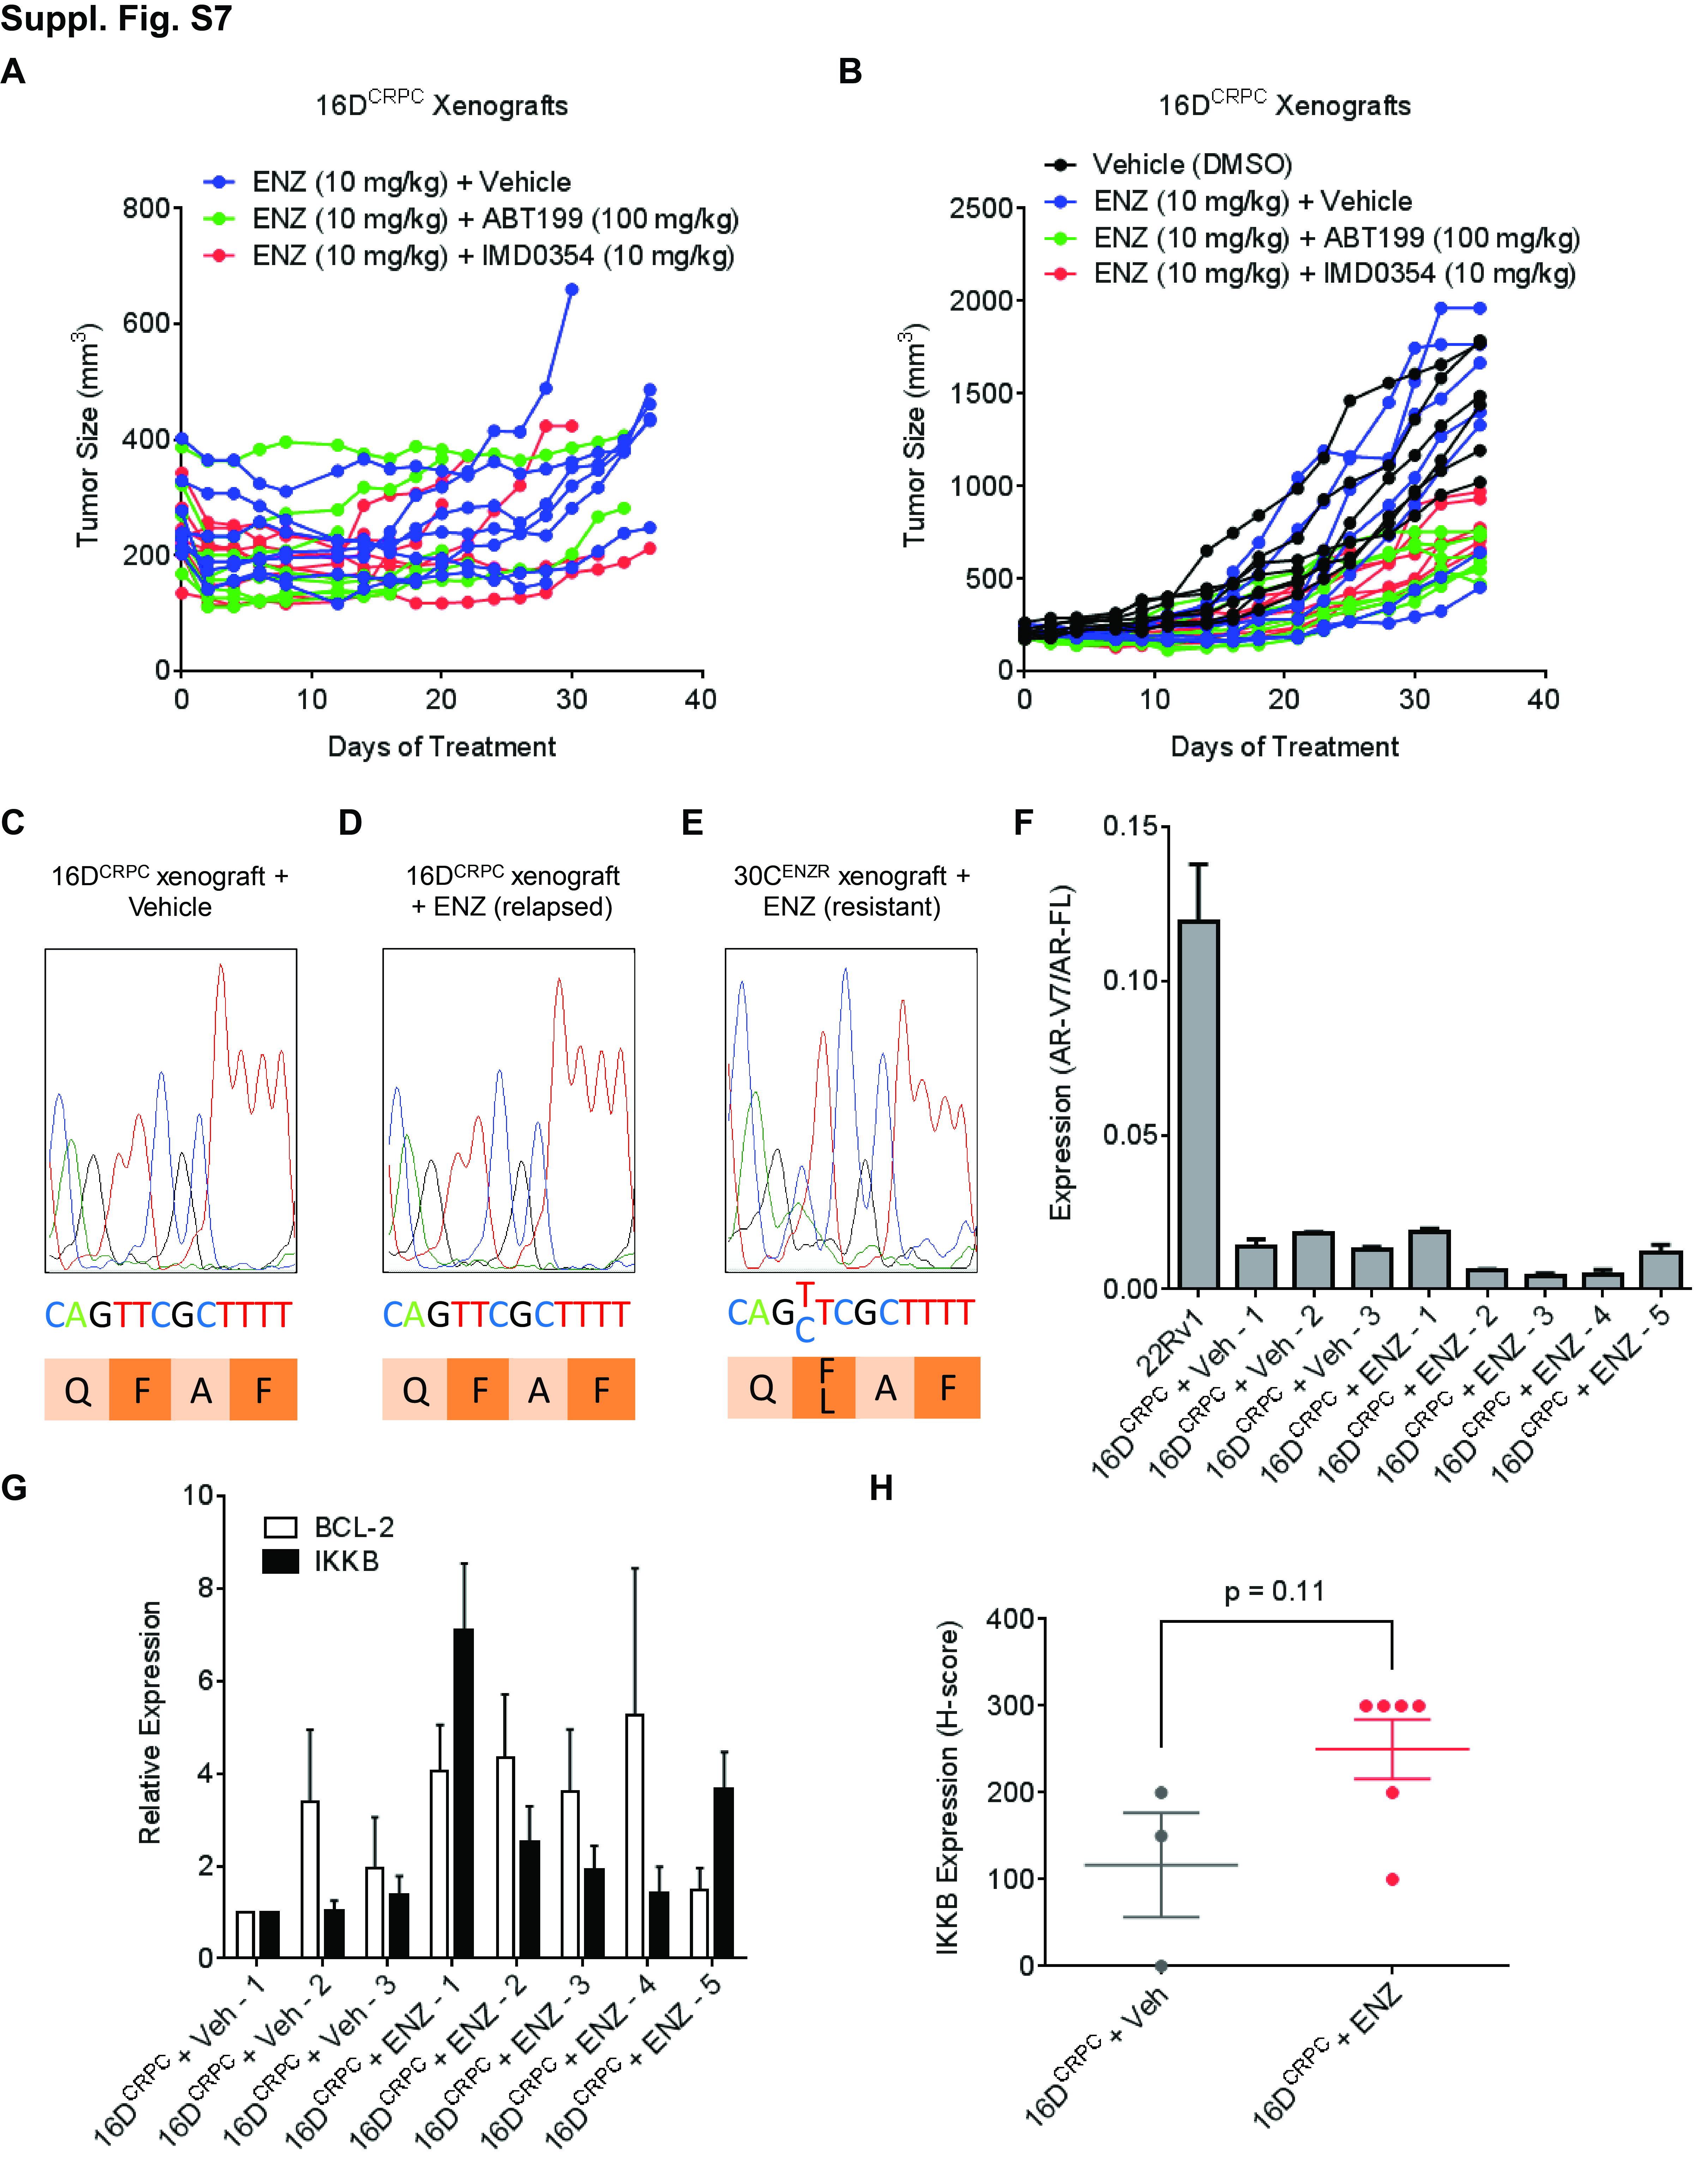


**Supplementary Figure S7. Emergence of ENZ resistance can be prevented by BCL-2 or IKKB inhibitor *in vivo* and is associated with IKKB upregulation.**

A. Tumor growth of 16DCRPC xenografts with the treatment of vehicle control (DMSO), 100 mg/kg ABT199 or 10 mg/kg IMD0354, in combination with 10 mg/kg ENZ, when the tumor size exceeds 200 mm3. Individual animals are denoted.

B. Tumor growth of 16DCRPC xenografts with the treatment of vehicle control (DMSO) or 10 mg/kg ENZ, when the tumor size exceeds 200 mm3. After the size of ENZ-treated tumor reaches 300 mm3, the mice are additionally treated with vehicle control (DMSO), 100 mg/kg ABT199 or 10 mg/kg IMD0354. Individual animals are denoted.

C~D. Representative sequencing results for AR point mutation F877L in 16DCRPC xenografts collected at the endpoint with treatment of vehicle (C) or ENZ (D).

E. Representative sequencing results for AR point mutation F877L in 30CENZR xenografts collected at the endpoint with treatment of ENZ.

F. mRNA levels of AR-V7 in 16DCRPC xenografts collected at the endpoint with treatment of vehicle (Veh) or ENZ. 22Rv1 used as AR-V7 positive control.

G. mRNA levels of BCL-2 and IKKB in 16DCRPC xenografts collected at the endpoint with treatment of vehicle (Veh) or ENZ.

H. Expression (H-score) of cytoplasmic IKKB protein in 16DCRPC xenografts collected at the endpoint with treatment of vehicle (Veh) or ENZ. p-value indicated.
