# Supplementary material for: Emergence of Enzalutamide Resistance in Prostate Cancer is Associated with BCL-2 and IKKB Dependencies
Source: Oxford University Press journal article supplement (doi:10.1158/1078-0432.ccr-20-3260), 2021-02-04
Supplement: 10780432ccr203260-sup-249714_2_supp_6883310_qnqsyh.docx [file 10780432ccr203260-sup-249714_2_supp_6883310_qnqsyh.docx]

**Supplementary Table 2. List of primers used for qPCR analyses**

| **Primer** | **Sequence (5’🡪3’)** |
| --- | --- |
| AR-F | CAGCCTATTGCGAGAGAGCTG |
| AR-R | GAAAGGATCTTGGGCACTTGC |
| AR-V7-F | CCATCTTGTCGTCTTCGGAAATGTTA |
| AR-V7-R | TTTGAATGAGGCAAGTCAGCCTTTCT |
| BCL-2-F | CTTTGAGTTCGGTGGGGTCA |
| BCL-2-R | GAAATCAAACAGAGGCCGCA |
| IKKB-F | TGACGTCAGAGCAGGAAGTG |
| IKKB-R | AGGCGCTCTTTCATTTCCCA |
| KLK3-F | TGTGTGCTGGACGCTGGA |
| KLK3-R | CACTGCCCCATGACGTGAT |
| NKX3.1-F | CAAATGCTTTGGGAACTGTG |
| NKX3.1-R | AAGGACAGCCAGATTTCTCC |
| TMPRSS2-F | GGACAGTGTGCACCTCAAAGAC |
| TMPRSS2-R | TCCCACGAGGAAGGTCCC |
| RPS28-F | CGATCCATCATCCGCAATG |
| RPS28-R | AGCCAAGCTCAGCGCAAC |
